# Supplementary material for: Clinical Experiences and Learning Outcomes of Medical Interns During Family Medicine Rotation in Primary Health Care Setting: A Qualitative Study
Source: Research Square preprint supplement (doi:10.21203/rs.3.rs-8433143/v1), 2026-02-02
Supplement: Supplementary file 1 [file 3553805930e598e00f728783.pdf]

## **SEMI-STRUCTURED QUESTIONNAIRE**

### **Title: Clinical Experiences and Learning Outcomes of Medical Interns During Family Medicine Rotation in Primary Health Care Setting: A Qualitative Study**

1. Tell me about your experiences working in the district – CHC and PHC facilities of Ekurhuleni North !.
2. Can you say that learning has taken place during these two months of your district rotation? Kindly explain.
3. Do you think your undergraduate training prepared you to work in a district (CHC / PHC facilities)? Kindly explain.
4. Do you think your specialist rotations so far prepared you to work in the district (CHC / PHC facilities)? Kindly explain.
5. What went well during this district (CHC / PHC) rotation? Kindly explain.
6. What can be improved? Kindly explain.
7. From your experience rotating through the district, are there gaps in your medical training? If there are, do you have any suggestions to bridge these gaps?
8. Would you consider Family Medicine as a speciality? Kindly explain.
9. Any last comments?
